# Supplementary material for: Invasive Fusariosis in Pediatric Hematology/Oncology and Stem Cell Transplant Patients: A Report from the Israeli Society of Pediatric Hematology-Oncology
Source: MDPI journal article supplement (doi:10.3390/jof8040387), 2022-04-11
Supplement: s1 [file s1]

**Supplementary Table S1: Patient Demographics, Treatment and Microbiological Data**

| Patient no. | Sex/age (yrs) | Underlying disorder | Preceding treatment          | Prior SCT? (1 yr) | Corticosteroid pre-treatment ? | Duration of neutropenia (days) | Antifungal prophylaxis | Pathogen               | Sites of involvement            | Diagnostic methods                                            | EORTC/MSG category | Antifungal therapy         | 90-day outcome             | Adjunctive therapy                |
|-------------|---------------|---------------------|------------------------------|-------------------|--------------------------------|--------------------------------|------------------------|------------------------|---------------------------------|---------------------------------------------------------------|--------------------|----------------------------|----------------------------|-----------------------------------|
| 1           | F/0.4         | AML                 | Chemotherapy (induction)     | No                | No                             | 30                             | Voriconazole           | <i>F. solani</i>       | Skin, blood, bone/joints, lungs | Cultures and PCR from blood, bronchoalveolar lavage and skin. | Proven             | L-AmB + posaconazole       | alive                      | Surgery                           |
| 2           | F/13          | Relapsed ALL        | Chemotherapy (consolidation) | No                | Yes                            | 16                             | Fluconazole            | <i>F. dimerum</i>      | Skin, liver, spleen, thyroid    | Skin culture and PCR                                          | Proven             | L-AmB + voriconazole       | alive                      | Granulocyte infusions<br><br>GCSF |
| 3           | M/1.1         | Aplastic anemia     | Immunotherapy (ATG/CSA)      | No                | No                             | Congenital                     | Fluconazole            | <i>F. proliferatum</i> | Skin, bone/joints               | Skin culture and PCR                                          | Proven             | L-AmB + voriconazole       | alive                      | Granulocyte infusions             |
| 4           | M/13.8        | AML                 | SCT                          | Yes               | No                             | 11                             | Fluconazole            | <i>F. solani</i>       | Skin/blood                      | Blood culture and PCR                                         | Proven             | L-AmB + voriconazole       | alive                      | -                                 |
| 5           | M/13.2        | Relapsed ALL        | SCT                          | Yes               | Yes                            | 54                             | Fluconazole            |                        | Skin, blood                     | Blood culture                                                 | Proven             | Voriconazole + caspofungin | Death with active fusarium | -                                 |
| 6           | F/14          | Thalassemia         | SCT                          | Yes               | No                             | 17                             | Fluconazole            |                        | Skin, sinus, blood              | Cultures from skin, sinus and blood                           | Proven             | AmB + voriconazole         | alive                      | Granulocyte infusions             |
| 7           | F/10.5        | Relapsed ALL        | SCT                          | Yes               | No                             | 60                             | Fluconazole            |                        | Skin                            | Culture from skin lesion                                      | Proven             | L-AmB + isavuconazole      | alive                      | GCSF                              |

|    |        |                                               |                              |     |     |            |              |                  |                        |                                                    |          |                                    |                            |                                    |
|----|--------|-----------------------------------------------|------------------------------|-----|-----|------------|--------------|------------------|------------------------|----------------------------------------------------|----------|------------------------------------|----------------------------|------------------------------------|
| 8  | M/3.8  | Congenital neutropenia due to ADA2 deficiency | None                         | No  | No  | Congenital | Fluconazole  |                  | Sinus                  | Culture from sinus                                 | Probable | L-Amb + isavuconazole              | alive                      | Granulocyte infusions Surgery      |
| 9  | M/16   | Aplastic anemia                               | None                         | No  | No  | 30         | Fluconazole  |                  | Sinus                  | Culture from sinus                                 | Probable | L-Amb + isavuconazole              | alive                      | Granulocyte infusions Surgery      |
| 10 | M/8.1  | Relapsed ALL                                  | SCT                          | Yes | No  | 60         | Fluconazole  |                  | Skin, sinus            | Cultures from skin and sinus                       | Proven   | AmB + voriconazole                 | Death with active fusarium | Granulocyte infusions              |
| 11 | M/14   | AML                                           | Chemotherapy (consolidation) | No  | No  | 11         | Itraconazole |                  | Skin, lung, liver      | Skin PCR and histopathology                        | Proven   | L-Amb + voriconazole               | alive                      | GSCF                               |
| 12 | M/18   | Relapsed ALL                                  | Chemotherapy                 | Yes | Yes | 6          | Itraconazole |                  | Sinus, lung            | Cultures and histopathology from sinus             | Proven   | AmB                                | Death with active fusarium | Granulocyte infusions GCSF Surgery |
| 13 | M/13   | AML                                           | Chemotherapy (consolidation) | No  | No  | 10         | Fluconazole  |                  | Skin, bone/joints/eyes | Cultures from synovial fluid                       | Proven   | AmB + voriconazole                 | Alive                      | -                                  |
| 14 | M/3    | ALL                                           | Chemotherapy (induction)     | No  | Yes | 50         | None         |                  | Skin (disseminated)    | Skin culture                                       | Proven   | AmB + voriconazole                 | Alive                      | GCSF                               |
| 15 | M/11   | AML (Fanconi)                                 | SCT                          | Yes | No  | 105        | Itraconazole |                  | Skin, bone, blood      | Blood culture, and histopathology from skin lesion | Proven   | L-Amb + posaconazole + terbinafine | alive                      | GSCF                               |
| 16 | M/10.3 | Relapsed ALL                                  | Chemotherapy (induction)     | No  | Yes | 14         | Itraconazole | <i>F. solani</i> | Skin, blood            | Blood culture, PCR from skin lesion                | Proven   | AmB + voriconazole                 | Death with active          | -                                  |

|    |        |                 |                              |                  |     |    |              |                       |              |                                                              |        |                      |                                  |               |
|----|--------|-----------------|------------------------------|------------------|-----|----|--------------|-----------------------|--------------|--------------------------------------------------------------|--------|----------------------|----------------------------------|---------------|
|    |        |                 |                              |                  |     |    |              |                       |              |                                                              |        |                      | fusarium                         |               |
| 17 | F/15.8 | AML             | SCT                          | Yes              | No  | No | Caspofungin  | <i>F. moniliforme</i> | Skin, sinus  | Culture and PCR from sinus, histopathology from skin lesions | Proven | AmB + voriconazole   | Death not attributed to fusarium | Surgery       |
| 18 | F/16   | AML             | Chemotherapy (consolidation) | No               | No  | 7  | Itraconazole | <i>F. solani</i>      | Skin, sinus  | Culture, histopathology and PCR from sinus                   | Proven | AmB + voriconazole   | alive                            | Surgery G-CSF |
| 19 | F/6    | Neuroblastoma   | Immunotherapy (anti GD2)     | Yes (autologous) | No  | No | None         | <i>F. solani</i>      | Blood, lungs | Blood culture and PCR                                        | Proven | Voriconazole         | alive                            |               |
| 20 | F/2    | AML             | Chemotherapy (induction)     | No               | No  | 30 | Itraconazole |                       | Sinus        | Culture, histopathology and PCR from sinus                   | Proven | L-AmB + voriconazole | alive                            | Surgery G-CSF |
| 21 | M/5.3  | Medulloblastoma | Chemotherapy                 | No               | Yes | No | None         |                       | Blood only   | Blood culture                                                | Proven | Voriconazole         | alive                            |               |
| 22 | M/4.2  | ALL             | Chemotherapy (consolidation) | No               | Yes | 17 | Itraconazole |                       | Sinus        | Culture and histopathology from sinus                        | Proven | L-AmB + voriconazole | alive                            | Surgery G-CSF |

ADA= adenosine deaminase; ALL=acute lymphoblastic leukemia; AmB=amphotericin B; AML=acute myeloid leukemia; EORTC/MSG= European Organization for Research and Treatment of Cancer/Mycoses Study Group; G-CSF= granulocyte colony-stimulating factor; L-AmB=liposomal amphotericin B; SCT=stem cell transplantation
